# Supplementary material
Source: PubMed Central journal article supplement (PMC2872173)
Supplement: NIHMS158849-supplement-erratum.pdf [file NIHMS158849-supplement-erratum.pdf]

**Error in Figure.** In the Clinical Trials article titled “A Randomized Trial Comparing the Efficacy and Safety of Intravitreal Triamcinolone With Observation to Treat Vision Loss Associated With Macular Edema Secondary to Central Retinal Vein Occlusion: the Standard Care vs Corticosteroid for Retinal Vein Occlusion (SCORE) Study Report 5” by the SCORE Study Research Group, published in the September 2009 issue of the *Archives* (2009;127[9]:1101-1114), there were errors in Figures 2C and 3C. The corrected Figure parts appear below.

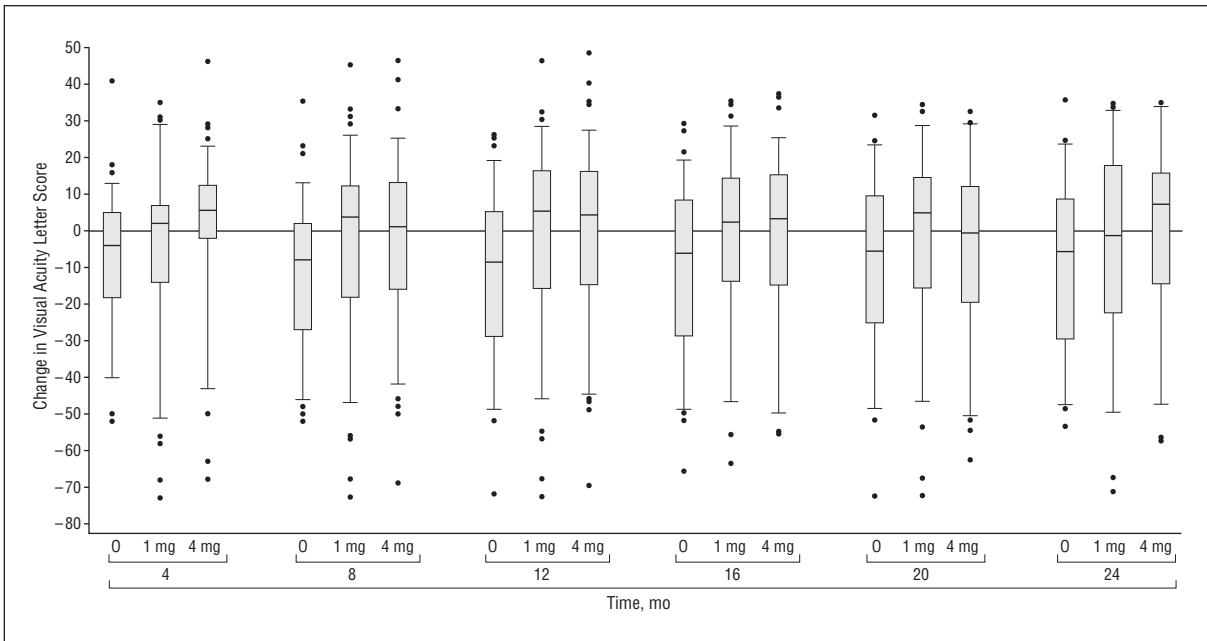

**Figure 2C.** Box plot with whiskers represents the 5th and 95th percentiles; the line in the box represents the median; dots, values outside the whiskers; 0, observation; 1 mg and 4 mg, doses of intravitreal triamcinolone acetate.

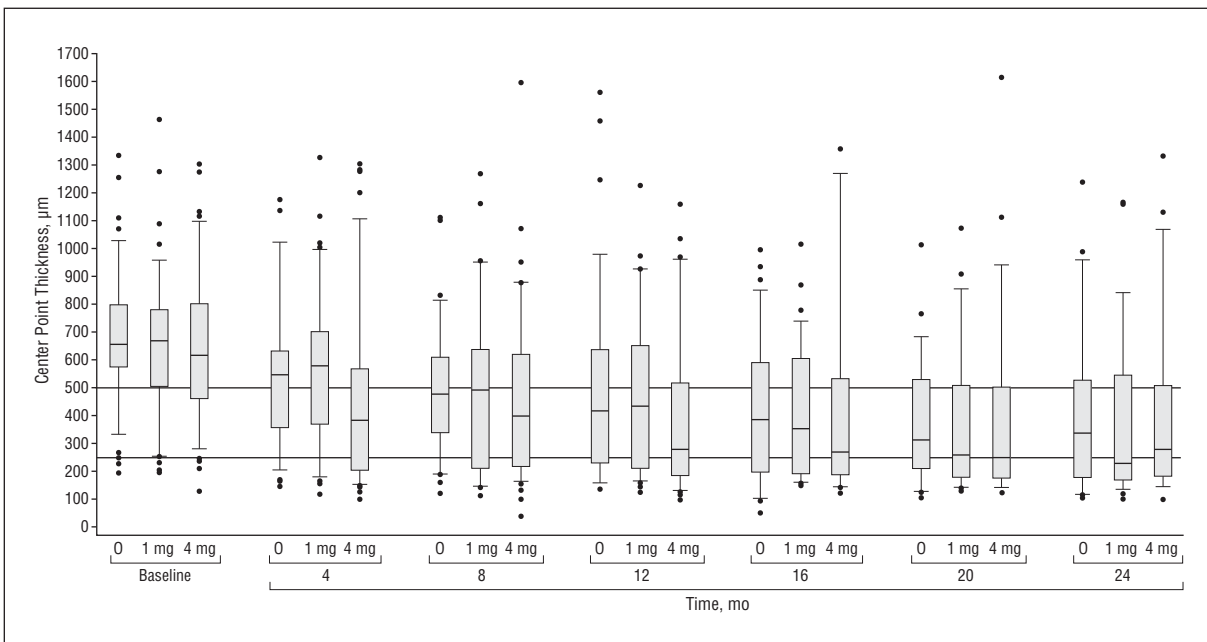

**Figure 3C.** Box plot with whiskers represent the 5th and 95th percentiles; the line in the box represents the median; dots, values outside the whiskers; 0, observation; 1 mg and 4 mg, doses of intravitreal triamcinolone acetate. Horizontal reference lines at 250 and 500  $\mu\text{m}$  are presented.
