# Supplementary material
Source: PubMed Central journal article supplement (PMC2872173)
Supplement: NIHMS158849-supplement-ETable.pdf [file NIHMS158849-supplement-ETable.pdf]

# A Randomized Trial Comparing the Efficacy and Safety of Intravitreal Triamcinolone With Observation to Treat Vision Loss Associated With Macular Edema Secondary to Central Retinal Vein Occlusion

*The Standard Care vs Corticosteroid for Retinal Vein Occlusion (SCORE)  
Study Report 5*

*The SCORE Study Research Group*

*Arch Ophthalmol. 2009;127(9):1101-1114*

**eTable. Sensitivity Analyses to Assess Consistency of Primary Efficacy Results of the SCORE-CRVO Trial**

| Method                                        | Results                                                                                                                                                                                                                                                                                                                       |
|-----------------------------------------------|-------------------------------------------------------------------------------------------------------------------------------------------------------------------------------------------------------------------------------------------------------------------------------------------------------------------------------|
| LOCF                                          |                                                                                                                                                                                                                                                                                                                               |
| Explanation                                   | Repeated the primary analysis using LOCF for dropouts before 12 mo                                                                                                                                                                                                                                                            |
| Time period                                   | 12 mo                                                                                                                                                                                                                                                                                                                         |
| Result                                        | Both triamcinolone acetonide groups were similar with respect to the primary efficacy outcome and significantly better than the observation group                                                                                                                                                                             |
| Note                                          | Within the 3 study groups, early visual acuity correlated highly with 12-mo visual acuity, so LOCF seems appropriate                                                                                                                                                                                                          |
| Per protocol analysis                         |                                                                                                                                                                                                                                                                                                                               |
| Explanation                                   | Repeated primary analysis including only study eyes with 12-mo visual acuity data and excluding participants who, before 12 mo, received an alternative treatment (ie, treatment crossovers) or a nonprotocol treatment, did not meet the eligibility criteria, or did not receive the treatment assigned at randomization    |
| Time period                                   | 12 mo                                                                                                                                                                                                                                                                                                                         |
| Result                                        | Both triamcinolone groups were similar with respect to the primary efficacy outcome and significantly better than the observation group                                                                                                                                                                                       |
| “Triamcinolone worst:” extreme-value scenario |                                                                                                                                                                                                                                                                                                                               |
| Explanation                                   | Repeated primary analysis, except that all missing cases in the triamcinolone groups were assumed to be failures, while all missing cases in the observation group were assumed to be successes; this provides the minimum possible estimate of the treatment effect that is consistent with the observed data                |
| Time period                                   | 12 mo                                                                                                                                                                                                                                                                                                                         |
| Result                                        | Nonsignificant treatment effect; however, a nonsignificant treatment effect for triamcinolone is unlikely (see Cook-DeMets and Diggle tests)                                                                                                                                                                                  |
| Cook-DeMets test <sup>1</sup>                 |                                                                                                                                                                                                                                                                                                                               |
| Explanation                                   | A test for treatment effect in which the <i>P</i> value depends not only on the observed data, but also on the assumptions the investigator makes about the extent of missing data in the treatment and control arms of the trial                                                                                             |
| Time period                                   | 12 and 24 mo                                                                                                                                                                                                                                                                                                                  |
| Result                                        | For the range of parameters investigated, to assume that intravitreal triamcinolone (1-mg and 4-mg doses combined) was not superior to observation, one must assume that at least 5 times as many successes as failures are missing in the observation group, and that this ratio is much smaller in the triamcinolone groups |
| Diggle test <sup>2</sup>                      |                                                                                                                                                                                                                                                                                                                               |
| Explanation                                   | Compared change from baseline in visual acuity of dropouts just before dropout with change from baseline in visual acuity at matching visits of those in the same treatment arm who subsequently stayed in study                                                                                                              |
| Time period                                   | 12 mo                                                                                                                                                                                                                                                                                                                         |
| Result                                        | No significant difference between dropouts and those who stayed in study                                                                                                                                                                                                                                                      |
| Note                                          | In the 3 study groups, early visual acuity changes from baseline correlated highly with 12-mo visual acuity changes from baseline, so that the Diggle test suggests that dropouts were similar to those who stayed in with respect to primary outcome                                                                         |
| Log-rank tests                                |                                                                                                                                                                                                                                                                                                                               |
| Explanation                                   | Compared treatment groups with respect to dropout rates                                                                                                                                                                                                                                                                       |
| Time period                                   | 12 and 24 mo                                                                                                                                                                                                                                                                                                                  |
| Result                                        | No significant difference among treatment groups                                                                                                                                                                                                                                                                              |

Abbreviations: CRVO, central retinal vein occlusion; LOCF, last observation carried forward; SCORE, Standard Care vs Corticosteroid for Retinal Vein Occlusion (study).

## REFERENCES

- Cook YD, DeMets DL. *Introduction to Statistical Methods for Clinical Trials*. Boca Raton, FL: Chapman & Hall; 2008:356-358.
- Diggle PJ. Testing for random dropouts in repeated measurement data. *Biometrics*. 1989;45:1255-1258.
